# Supplementary material for: Dominance of Deleterious Alleles Controls the Response to a Population Bottleneck
Source: PubMed Central journal article supplement (PMC4552954; doi:10.1371/journal.pgen.1005436), 2015-08-28
Supplement: pgen.1005436.s003.pdf [file pgen.1005436.s003.pdf]

### Text S3. Simulation code.

Here we present the simulation code (written in C) used in our paper. This can also be found at <http://genetics.bwh.harvard.edu/wiki/sunyaevlab/dbalick>.

We note that some included libraries are lab-specific, but perform very basic statistical functions. Interested readers should substitute appropriate routines in this code to produce results. Alternatively, a compiled version is available on the website listed above.

```
/* burden_sim */
/* by David Reich */

#include <nag.h>
#include <nag_stdlib.h>
#include <stdio.h>
#include <stdlib.h>
#include <math.h>
#include <nage04.h>
#include <nicklib.h>

FILE *fout;

void newgravel();
void tennesen();
void lohmueller();
void simplebottle();
void calcstats();
int drift();
int mutate();
void printhist();

int totmuts;
int fixedmuts;

#define MX 650000
#define BINS 100

void printhist(int muts,int mat[MX][3],int pop[2])
{
    int i,j,hist[BINS][2],count[2],val;

    for (j=0;j<2;j++) {
        count[j]=0;
        for (i=0;i<BINS;i++) hist[i][j]=0;
        for (i=0;i<muts;i++) {
            val=(int)floor(1.0*BINS*mat[i][j]/pop[j]);
            if (mat[i][j]>0 && mat[i][j]<pop[j]) {
                ++hist[val][j];
                ++count[j];
            }
        }
        fprintf(fout,"\nlower\tupper\tpop0\tpop1\n");
        for (i=0;i<BINS;i++) {

            fprintf(fout,"%3.2lf\t%3.2lf\t%6.5lf\t%6.5lf\n",1.0*i/BINS,1.0*(i+1)/BINS,1.0*hist[i][0]/count[0],1.0*hist[i][1]/count[1]);
        }
    }
}

void calcstats(long x,int gen, int speedup1,int speedup2,int burnin1,int burnin2, int lastgen, double mu, double s, double dom, int mat[MX][3],int pop[2],int muts,int len,int speed)
{
```

```

int i,j;
double sum[2],addburden[2],theta[2],mean[2],pi[2],recburden[2],vv,gval;

for (j=0;j<2;j++) {
    sum[j]=pi[j]=recburden[j]=addburden[j]=mean[j]=theta[j]=0;
    for (i=0;i<muts;i++) {
        vv=(1.0*mat[i][j]/pop[j])*(1-(1.0*mat[i][1-j]/pop[1-j]));
        if (vv<0)
printf("%d\t%d\t%d\t\t%d\t\t%d\t\t%d\t\t%d\n",gen,j,i,mat[i][j],pop[j],mat[i][1-j],pop[1-j]);
        addburden[j]+=(1.0*mat[i][j]/(1.0*pop[j]))/len;
        gval=(1.0*mat[i][j]*(mat[i][j]-1)/(1.0*pop[j]*(pop[j]-1)))/len;
        if (gval<0) fatalx("ERROR\n");
        recburden[j]+=gval;
        if (mat[i][j]>0 && mat[i][j]<pop[j]) {
            pi[j]+=2.0*mat[i][j]*(pop[j]-
mat[i][j]/(1.0*pop[j]*(pop[j]-1)*len);
            theta[j]+=1.0/((log(1.0*pop[j])+0.577)*len);
            mean[j]+=1.0*mat[i][j]/(1.0*pop[j]);
            ++sum[j];
        }
    }
    mean[j]=mean[j]/sum[j];
}

fprintf(fout,"%ld\t%d\t\t%d\t\t%d\t\t%d\t\t%d\t\t%d\t\t%3.2lf\t%10.9lf\t%4.3lf\t\t%d\t\t%
\t%d\t\t%d\t\t%10.9lf\t%10.9lf\t%10.9lf\t%10.9lf\t%10.9lf\t%10.9lf\t%10.9lf\t%10.9lf\t%10.9lf\t%10.9lf\n",
x,gen,gen-lastgen,speedup1,speedup2,-burnin1,-
burnin2,lastgen,len,100000000*mu,s,dom,totmuts,fixedmuts,muts,pop[0]*speed,pop[1]*speed,

pi[0],pi[1],theta[0],theta[1],mean[0],mean[1],recburden[0],recburden[1],addburden[
0],addburden[1]);
printf("%d\t%d\t\t%d\t\t%7.6lf\t%7.6lf\t%7.6lf\t%7.6lf\n",gen,speed*pop[0],speed*pop[1
],pi[0],pi[1],addburden[0],addburden[1]);
}

void newgravel(int gen,int pop[2],int speed)
{
    int j;
    double p;

    pop[0]=28948;
    if (gen<3880) pop[1]=pop[0];
    if (gen>=3880 && gen<5000) pop[1]=3722;
    if (gen>=5000) pop[1]=(int)floor(2064*exp(0.003857868074807*(gen-5000)));
    /* end time is 5920 */
    for (j=0;j<2;j++) pop[j]=(int)floor(0.5+1.0*pop[j]/speed);
}

void simplebottle(int gen,int pop[2],int speed)
{
    int j;
    double p;

    pop[0]=pop[1]=28948;
    if (gen>=3880 && gen<4080) pop[1]=500;
    for (j=0;j<2;j++) pop[j]=(int)floor(0.5+1.0*pop[j]/speed);
}

void tennesse(int gen,int pop[2],int speed)
{
    int j;
    double p;

    if (gen<5716) pop[0]=28948;
    if (gen>=5716 && gen<=5920) pop[0]=(int)floor(28948*exp(0.0166*(gen-5716)));

    if (gen<3880) pop[1]=28948;
    if (gen>=3880 && gen<5000) pop[1]=3722;
    if (gen>=5000 && gen<5716) pop[1]=(int)floor(2064*exp(0.00307*(gen-5000)));
    if (gen>=5716) pop[1]=(int)floor(18900*exp(0.0195*(gen-5716)));
    /* end time is 5920 */
    for (j=0;j<2;j++) pop[j]=(int)floor(0.5+1.0*pop[j]/speed);
}

```

```

}

int drift(int gens,int split,int newpop[2],int oldpop[2],int mat[MX][3], int muts,double
s,double dom)
{
    int i,j;
    double p,q,exp;

//    printf("selection=%8.7lf\n",s);
    for (i=0;i<muts;i++) {
        for (j=0;j<2;j++) {
            if ((j==0) || (j==1 && split==1)) {
                p=1.0*mat[i][j]/oldpop[j];
                q=1-p;

                exp=(p*p*(1+s)+p*q*(1+dom*s))/(p*p*(1+s)+2*p*q*(1+dom*s)+q*q);
                mat[i][j]=ranbinom(newpop[j],exp);
            }
            else mat[i][1]=mat[i][0];
        }
        if (mat[i][0]+mat[i][1]==0) {
            for (j=0;j<3;j++) mat[i][j]=mat[muts-1][j];
            --muts;
        }
        if ((mat[i][0]==newpop[0]) && (mat[i][1]==newpop[1])) {
            for (j=0;j<3;j++) mat[i][j]=mat[muts-1][j];
            --muts;
            ++fixedmuts;
        }
    }

    return(muts);
}

int mutate(int split,double param,int pop[2],int mat[MX][3],int gen,int muts)
{
    int newmuts,j,k;

    for (k=0;k<2;k++) {
        if ((k==0) || (k==1 && split==1)) {
            newmuts=(int)ranpoiss(param*pop[k]);
            totmuts+=newmuts;
            if (muts+newmuts>MX) fatalx("overflow\n");
            for (j=muts;j<muts+newmuts;j++) {
                mat[j][k]=1;
                mat[j][1-k]=0;
                if (k==0 && split<1) mat[j][1]=1;
                mat[j][2]=gen;
            }
            muts=muts+newmuts;
        }
    }

    return(muts);
}

void main (int argc, char *argv[])
{
    int
split,lastgen,pops,newmuts,muts,i,j,k,len,newpop[2],oldpop[2],burnin1,burnin2,mat[MX][3],
speedup1,speedup2,speed;
    double mu,s,dom;
    long x;

    lastgen=5921; // currently set for Gravel model
    mu=atof(argv[1]); // mutation rate per base pair
    s=atof(argv[2]); // selection coefficient
    dom=atof(argv[3]); // dominance coefficient classic h (0.5 is additive,
1 is fully recessive for the new allele)
    len=atoi(argv[4]); // locus size

```

```

        burnin1=atoi(argv[5]);           // burnin generations for most ancient
burning
        burnin2=atoi(argv[6]);           // burnin generations for more recent burnin
        speedup1=atoi(argv[7]);          // speedup factor which is an integer for
most ancient burnin
        speedup2=atoi(argv[8]);          // speedup factor which is an integer for
more recent burnin

        fout = fopen(argv[9],"w");        // output file name
        fprintf(fout, "seed\tabsolute_gen\tgen_in_past\ttspeedup1\ttspeedup2\ttburnin1\ttburnin
2\tenddate\tlocus_length_in_bp\tmu\tts\tth\tttotmuts\ttfixmuts\ttsegmuts\tpop0\tpop1\t");
        fprintf(fout, "pi0\tpil\ttheta0\ttheta1\ttmean0\ttmean1\trecburd0\trecburd1\ttaddburd
0\ttaddburd1\n");
        x=seednum();
        SRAND(x);
        totmuts=fixedmuts=muts=split=0;
        speed=speedup1;
        for (i=-burnin1;i<=lastgen;i=i+speed) {
            if (i>=3880) split=1;          // split time
            simplebottle(i,newpop,speed);
            muts=drift(i,split,newpop,oldpop,mat,muts,speed*s,dom);
            muts=mutate(split,speed*mu*len,newpop,mat,i,muts);
            if (i>=-(burnin2+1)) speed=speedup2;
            for (j=0;j<2;j++) oldpop[j]=newpop[j];
            if ((i%5000==0 && i<0) || (i%100==0 && i>=0) || (i==lastgen))
calcstats(x,i,speedup1,speedup2,burnin1,burnin2,lastgen,mu,s,dom,mat,newpop,muts,len,spee
d);
        }
        printhist(muts,mat,newpop);
        fclose(fout);
}

```
